# Supplementary material
Source: PubMed Central journal article supplement (PMC1979160)

## Supplementary Figure 2

**A**

```

Rat MAQAYWQCYPWLVLLCACAWSYPGPESLGREDVRDCSTNPPRLPVTAVNT 50
Mouse MAQAYWQCYPWLVLLCACAWSYPEPKYLGREDVRNCSTSPERLPVTAVNT 50
Human MARAHWGC@PWLVLLCACAWGHTKPVLDLGGQDVRNCSTNPPRLPVTAVNT 50

Rat TMRLAALRQOMEKSNLSAYIIPDPTDAHMESEYIGKHDERRAWISGFTGSAG 100
Mouse TMRLAALRQOMETWNLAYSAYIIPDPTDAHMESEYIGKPKRREWISGFTGSAG 100
Human TMSL@TALRQOMQ@NLSAYIIP@TDAHMESEYIG@HDERRAWITGFTGSAG 100

Rat TAVVTKKKAAVWTDSTRYWTQAEQMDCNWELHKEVSISSIVAWILAEVDP 150
Mouse TAVVTMGKAAVWTDSTRYWTQAEQMDCNWELHKEVSISSIVAWILAEVDP 150
Human TAVVTMKKAAVWTDSTRYWTQAEQMDCNWELHKEV@TTFIVTWL@TEIPA 150

Rat GENVGFDPFLFSPVGSWENYDQELQDSNRHLLSITTNLVDVAVGSEPPVP 200
Mouse G@NVGFDPFLFSPVDSWKNYDQGFQDSRHL@L@S@T@TNLVDVAVGSEPPVP 200
Human G@RVGFDPFLFSLIDT@WESYDLALQGSNR@L@V@S@ITTNLVDL@V@GSEPPVP 200

Rat SQPIYALPKEFTGSTWQEKVSAIRSYM@NHTMAPTGVLLSALDE@TAWL@FN 250
Mouse SQPIYALPKEFTGSTWQEKVSA@RSYMEH@HAKTPTGVLLSALDE@TAWL@FN 250
Human NQPIYALQ@E@FTGSTWQEKVSG@RS@M@QKH@K@V@P@T@VLLSAL@E@TAWL@FN 250

Rat LRSSDIPYNPPFFYSYLLT@DSSIRL@FN@K@SR@FS@LET@L@Q@L@NT@NCT@L@P@M@C@V 300
Mouse LRSSDIPYNPPFFYSY@L@L@T@N@S@I@R@L@F@N@K@S@R@F@S@L@E@T@L@Q@L@N@T@N@C@T@L@P@M@C@V 300
Human LR@S@D@I@P@Y@N@P@P@F@F@Y@S@Y@L@L@T@D@S@S@I@R@L@F@N@K@S@R@F@S@S@E@T@L@S@Y@L@N@S@S@C@T@G@P@M@C@V 300

Rat QLEDYSQIR@D@G@V@K@Y@A@S@G@N@V@K@I@L@I@G@I@S@Y@T@T@Y@G@V@D@V@I@P@K@E@K@L@V@T@E@T@Y@S@P@V 350
Mouse QLEDYSQVR@D@S@V@K@Y@A@S@G@D@V@K@I@L@I@G@S@Y@T@T@Y@G@V@E@V@I@P@K@E@K@L@V@T@E@T@Y@S@P@V 350
Human QI@E@D@Y@S@Q@V@R@D@S@I@Q@A@Y@S@L@G@D@V@R@I@W@I@G@T@S@Y@T@M@Y@G@I@Y@E@M@I@P@K@E@K@L@V@T@E@T@Y@S@P@V 350

Rat MLIKAVKNSKEQALLKASHVRDAVAVIQYLVWLEKNVPKGT@V@D@E@F@S@G@A@E@H 400
Mouse MLIKAVKNSKEQALLK@S@HVRDAVAVIQYLVWLEKNVPKGT@V@D@E@F@S@G@A@E@Y 400
Human MMTKAVKNSKEQALLKASHVRDAVAVIRYLVWLEKNVPKGT@V@D@E@F@S@G@A@E@I 400

Rat IDQLRRNENFSSG@P@S@F@E@T@I@S@A@S@G@L@N@A@L@A@H@Y@S@P@T@K@E@L@H@R@K@L@S@D@E@M@Y@L@V@D 450
Mouse ID@L@R@R@N@E@N@F@S@S@G@P@S@F@E@T@I@S@A@S@G@L@N@A@L@A@H@Y@S@P@T@K@E@L@H@R@K@L@S@D@E@M@Y@L@V@D 450
Human VDKFRGEB@Q@FSSG@P@S@F@E@T@I@S@A@S@G@L@N@A@L@A@H@Y@S@P@T@K@E@L@N@R@K@L@S@D@E@M@Y@L@D 450

Rat SGGQYWDGTTDITR@T@V@H@W@G@T@P@T@A@F@Q@E@A@Y@T@R@V@L@M@G@N@I@D@L@S@R@L@V@F@P@A@T@S@G 500
Mouse SGGQYWDGTTDITR@T@V@H@W@G@T@P@T@A@F@Q@E@A@Y@T@R@V@L@M@G@N@I@D@L@S@R@L@V@F@P@A@T@S@G 500
Human SGGQYWDGTTDITR@T@V@H@W@G@T@P@S@A@F@Q@E@A@Y@T@R@V@I@G@N@I@D@L@S@R@L@I@F@P@A@T@S@G 500

Rat RVVEAFARRALWEVGLNYGHGTGHGIGNFLCVHEW@P@V@G@F@Q@Y@N@N@M@A@K@G@M 550
Mouse RVIEAFARRALWEVGLNYGHGTGHGIGNFLCVHEW@P@V@G@F@Q@Y@N@N@I@A@M@A@K@G@M 550
Human RMVEAFARRALW@D@AGLNYGHGTGHGIGNFLCVHEW@P@V@G@F@Q@S@N@N@I@A@M@A@K@G@M 550

Rat FTSIEPGYYDGEFGIRLEDVALVVEAKTKYPGTYLTFELVSFV@P@Y@D@R@N@L 600
Mouse FTSIEPGYYHDGEFGIRLEDVALVVEAKTKYPGDYLT@F@E@L@V@S@F@V@P@Y@D@R@N@L 600
Human FTSIEPGYYK@D@G@E@F@G@I@R@L@E@D@V@L@V@V@E@A@K@T@K@Y@P@G@S@Y@L@T@F@E@V@S@F@V@P@Y@D@R@N@L 600

Rat IDVSL@S@P@E@L@Q@Y@L@N@R@Y@Y@Q@T@I@R@E@N@I@G@P@E@L@Q@R@R@Q@L@L@E@E@F@A@W@L@E@R@H@T@E@P@L@S@A 650
Mouse IDVRL@S@P@E@L@Q@Y@L@N@R@Y@Y@Q@T@I@R@E@N@V@G@P@E@L@Q@R@R@Q@L@L@E@E@F@A@W@L@E@Q@H@T@E@P@L@S@A 650
Human IDVSL@S@P@E@H@L@Q@Y@L@N@R@Y@Y@Q@T@I@R@E@K@V@G@P@E@L@Q@R@R@Q@L@L@E@E@F@E@W@L@Q@H@T@E@P@L@A@A 650

Rat SAPHTTSLASMMVASALAILSWSC 674
Mouse RAPHITISWTS@L@W@V@L@C@P@C@H@P@O@L@E 673
Human RAPDTASWASV@L@V@S@T@L@A@I@L@G@W@S@V 674

```

## Supplementary Figure 2. Rat APP protein sequence and TX3.833 staining of cells induced to express APP.

(A) Amino acid sequence alignment of rat, mouse, and human APP. Gray boxes, amino acids differing from rat sequence. (B, C) Untransfected CHO cells (CHO) or cells stably transfected with rat APP cDNA (CHO/APP) were subjected to detergent solubilization for Western analysis with TX3.833 (B) or the intact cells immunostained with TX3.833 (green) and phalloidin (red; control for transfection efficiency). A representative transfected cell is shown in (C). Bar = 10  $\mu$ m

**B**

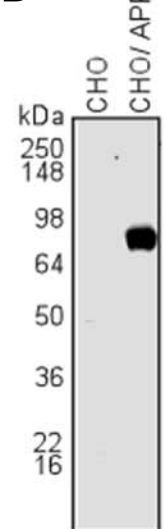

**C**

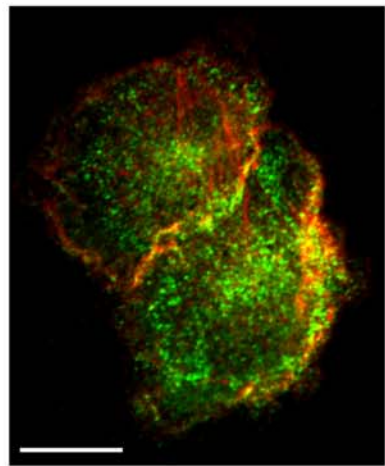

Supplement: NIHMS24197-supplement-S2.pdf [file NIHMS24197-supplement-S2.pdf]
