# Supplementary material
Source: PubMed Central journal article supplement (PMC1979160)
Supplement: NIHMS24197-supplement-S4.pdf [file NIHMS24197-supplement-S4.pdf]

## Supplementary Figure 4

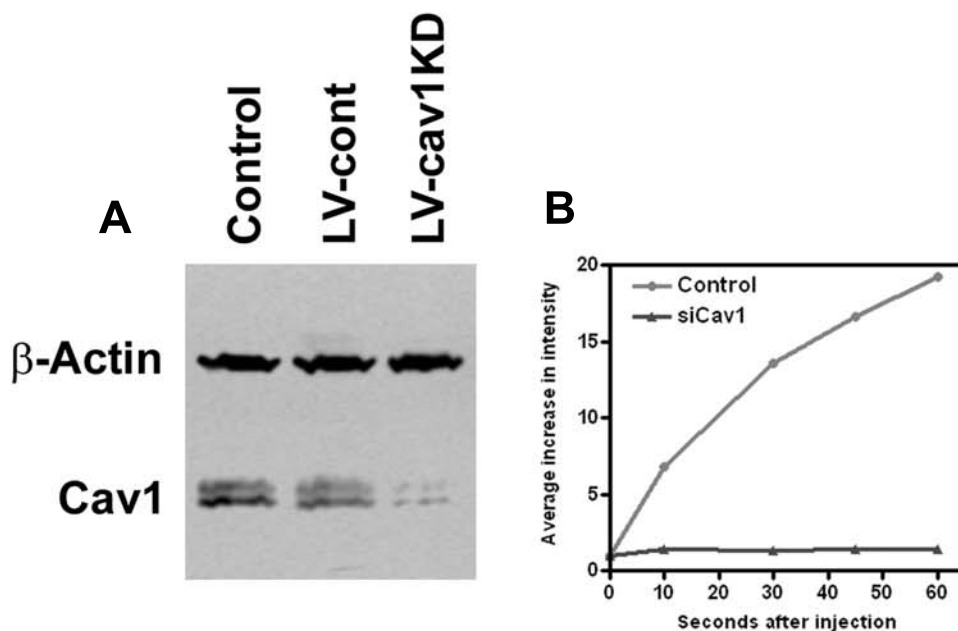

**Supplementary Figure 4. Assessment of caveolin-1 knockdown in rat tissue.** (A) Western analysis of implanted lung untreated (Control) or treated with either control lentivirus (LV-cont), or lentivirus expressing rat caveolin-1 shRNA (LV-cav1KD). There is a  $\geq 90\%$  decrease in caveolin-1 expression in LV-cav1KD tissue relative to both control tissues. (B) Graph of the uptake of mAPP over time in control and caveolin-1 knockdown lung tissues. Fluorescence intensity was quantified from low magnification images and plotted versus time.
