# Supplementary material
Source: PubMed Central journal article supplement (PMC1979160)
Supplement: NIHMS24197-supplement-S5.pdf [file NIHMS24197-supplement-S5.pdf]

## Supplementary Figure 5

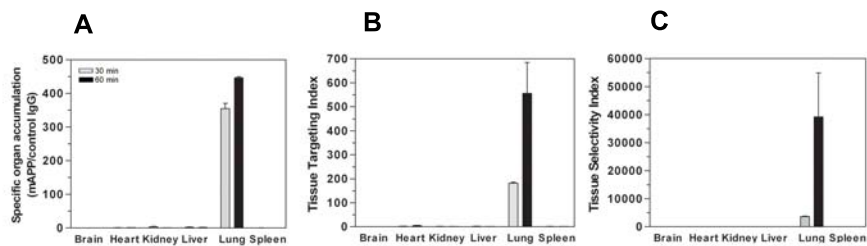

**Supplementary Figure 5. Lung targeting indices from in vivo biodistribution analysis of mAPP.**  $^{125}\text{I}$ -mAPP was injected intravenously before tissue excision at 30 min and 60 min for weighing and counting for gamma radioactivity. Calculation of the **(A)** the specific organ accumulation (ratio of TX3.833 to control mIgG in each organ) **(B)** tissue targeting index (TTI = antibody in tissue/g of tissue/antibody in blood/g of blood) and **(C)** tissue selectivity index (TSI = TTI for targeting IgG /TTI for control IgG) of  $^{125}\text{I}$ -mAPP at 30 min (gray bar) or 60 min (black bar) for the indicated organs.
