# Supplementary material
Source: PubMed Central journal article supplement (PMC1979160)
Supplement: NIHMS24197-supplement-S6.pdf [file NIHMS24197-supplement-S6.pdf]

## Supplementary Figure 6

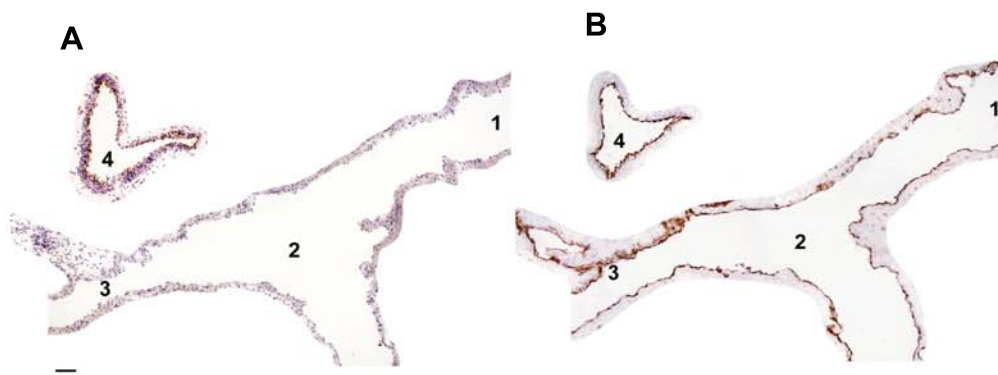

**Supplementary Figure 6. Segmental expression of APP in lung vasculature.** Serial cryosections of rat lung tissue exposing a large segment of the pulmonary artery were immunostained with mAPP (**A**) or G278 podocalyxin antibody (**B**). Numbers indicate arterial branch points. Bar = 100 $\mu$ m.
