# Supplementary material
Source: PubMed Central journal article supplement (PMC1979160)
Supplement: NIHMS24197-supplement-T1.pdf [file NIHMS24197-supplement-T1.pdf]

**Supplementary Table 1: Peptides identified by mass spectrometry for rat caveolin-1 and APP.** Unique tryptic peptides of rat caveolin-1 and APP identified are listed in table **A** and **B**, respectively. The left column lists primary amino acid positions, and the right column lists charge status of the precursors.

**A**

| Position  | Peptide Sequence              | Charge Status |    |    |
|-----------|-------------------------------|---------------|----|----|
|           |                               | Z1            | Z2 | Z3 |
| 6 - 19    | YVDSEGHLYTVPIR                |               | *  | *  |
| 6 - 30    | YVDSEGHLYTVPIREQGNIYKPNNK     |               |    | *  |
| 20 - 30   | EQGNIYKPNNK                   | *             | *  |    |
| 20 - 39   | EQGNIYKPNNKAMADEVNEK          |               |    | *  |
| 31 - 39   | AMADEVNEK                     | *             | *  |    |
| 40 - 47   | QVYDAHTK                      | *             |    |    |
| 40 - 54   | QVYDAHTKEIDLVNR               |               | *  |    |
| 48 - 54   | EIDLVNR                       | *             |    |    |
| 48 - 57   | EIDLVNRDPK                    | *             | *  |    |
| 48 - 65   | EIDLVNRDPKHLNDDVVK            |               | *  | *  |
| 54 - 65   | DPKHLNDDVVK                   |               | *  |    |
| 58 - 65   | HLNDDVVK                      | *             | *  |    |
| 58 - 86   | HLNDDVVKIDFEDVIAEPEGTHSFDGIWK |               |    | *  |
| 66 - 86   | IDFEDVIAEPEGTHSFDGIWK         |               | *  | *  |
| 87 - 96   | ASFTTFTVTK                    | *             | *  |    |
| 87 - 101  | ASFTTFTVTKYWFYR               |               | *  | *  |
| 166 - 171 | IFSNIR                        | *             |    |    |

**B**

| Position  | Peptide Sequence                  | Charge Status |    |    |
|-----------|-----------------------------------|---------------|----|----|
|           |                                   | Z1            | Z2 | Z3 |
| 64 - 84   | SNLSAYIIPDTDAHMSYIGK              |               | *  | *  |
| 88 - 106  | RAWISGFTGSAGTAVVTK                |               | *  | *  |
| 88 - 107  | RAWISGFTGSAGTAVTKK                |               |    | *  |
| 89 - 106  | AWISGFTGSAGTAVVTK                 | *             | *  | *  |
| 89 - 107  | AWISGFTGSAGTAVTKK                 |               | *  |    |
| 107 - 116 | KKAAVWTDSR                        |               | *  |    |
| 108 - 116 | KAAVWTDSR                         |               | *  |    |
| 109 - 116 | AAVWTDSR                          | *             | *  |    |
| 109 - 123 | AAVWTDSRYWTQAER                   |               | *  |    |
| 117 - 123 | YWTQAER                           | *             | *  |    |
| 179 - 209 | HLLSITTNLVDVAWGSRPPVPSQPIYALPK    |               | *  | *  |
| 210 - 220 | EFTGSTWQEK                        | *             | *  |    |
| 210 - 224 | EFTGSTWQEKVSAIR                   |               | *  |    |
| 253 - 274 | SSDIPYNPFYSYLLTDDSSIR             |               | *  | *  |
| 310 - 321 | DGVKAYASGNVK                      |               | *  |    |
| 314 - 321 | AYASGNVK                          | *             |    |    |
| 314 - 341 | AYASGNVKILIGISYTTYGVYDVIPKEK      |               |    | *  |
| 322 - 339 | ILIGISYTTYGVYDVIPK                |               | *  | *  |
| 340 - 354 | EKLVTETYSVMLIK                    |               | *  |    |
| 342 - 354 | LVTETYSVMLIK                      |               | *  |    |
| 358 - 366 | NSKEQALLK                         |               | *  |    |
| 358 - 371 | NSKEQALLKASHVR                    |               | *  |    |
| 361 - 371 | EQALLKASHVR                       |               | *  |    |
| 367 - 385 | ASHVRDAVAVIQYLVWLEK               |               |    | *  |
| 372 - 385 | DAVAVIQYLVWLEK                    |               | *  |    |
| 372 - 389 | DAVAVIQYLVWLEKKNVPK               |               | *  |    |
| 386 - 405 | NVPKGTVDEFSGAEHIDQLR              |               | *  | *  |
| 389 - 405 | GTVDEFSGAEHIDQLR                  | *             | *  | *  |
| 389 - 406 | GTVDEFSGAEHIDQLRR                 |               | *  |    |
| 405 - 435 | NENFSSGSPFETISASGLNAALAHYSPTK     |               | *  | *  |
| 405 - 439 | NENFSSGSPFETISASGLNAALAHYSPTKELHR |               |    | *  |
| 406 - 435 | RNENFSSGSPFETISASGLNAALAHYSPTK    |               |    | *  |
| 440 - 464 | KLSLDEMYLVDSGGQYWDGTTDITR         |               |    | *  |
| 441 - 464 | LSLDEMYLVDSGGQYWDGTTDITR          |               | *  |    |
| 465 - 475 | TVHWGTPTAFQK                      | *             | *  |    |
| 465 - 481 | TVHWGTPTAFQKEAYTR                 |               | *  | *  |
| 482 - 491 | VLMGNIDLSR                        | *             | *  |    |
| 492 - 501 | LVFPAATSGR                        | *             | *  |    |
| 502 - 508 | VVEAFAR                           | *             |    |    |
| 549 - 567 | GMFTSIEPGYYQDGEFGIR               |               | *  |    |
| 568 - 578 | LEDVALVVEAK                       | *             | *  |    |
| 579 - 598 | TKYPGTYLTFELVSFVPHYDR             |               | *  | *  |
| 581 - 598 | YPGTYLTFELVSFVPHYDR               |               | *  |    |
| 599 - 616 | NLIDVSLLSPEQLQYLNR                |               | *  | *  |
| 617 - 622 | YYQTIR                            | *             | *  |    |
| 617 - 631 | YYQTIRENIGPELQR                   |               | *  | *  |
| 623 - 631 | ENIGPELQR                         | *             | *  |    |
| 632 - 643 | RQLLEEFAWLER                      |               | *  | *  |
| 633 - 643 | QLLEEFAWLER                       |               | *  |    |
